# Supplementary material for: Lineages to landscapes: Mitogenomic insights and climate refugia informing proactive conservation of the Endangered Tricarinate Hill Turtle (Melanochelys tricarinata) in the Indian Subcontinent
Source: Research Square preprint supplement (doi:10.21203/rs.3.rs-7140563/v1), 2025-07-22
Supplement: Supplementary file 1 [file 7f6447fe39181f3968ea4d0e.docx]

**Supplementary information**

**Lineages to landscapes: Mitogenomic insights and climate refugia informing proactive conservation of the Endangered Tricarinate Hill Turtle (*Melanochelys tricarinata*) in the Indian Subcontinent**

Imon Abedin1, Angkasa Putra2, Hye-Eun Kang3, Arunima Singh4, Shailendra Singh4, Won-Kyo Jung5,6,7,Hyun-Woo Kim5,7,8*, Shantanu Kundu2,9,10*

1Dibru-Saikhowa Conservation Society, Tinsukia 786147, India

2Interdisciplinary Program of Marine and Fisheries Sciences and Convergent Technology, Pukyong National University, Busan 48513, Republic of Korea

3Institute of Marine Life Science, Pukyong National University, Busan 48513, Republic of Korea.

4Turtle Survival Alliance Foundation India, Lucknow 226 012, India.

5Research Center for Marine Integrated Bionics Technology, Pukyong National University, Busan 48513, Republic of Korea

6Major of Biomedical Engineering, Division of Smart Healthcare and New-Senior Healthcare Innovation Center (BK21 Plus), Pukyong National University, Busan 48513, Republic of Korea

7Marine Integrated Biomedical Technology Center, National Key Research Institutes in Universities, Pukyong National University, Busan 48513, Republic of Korea

8Department of Marine Biology, College of Fisheries Science, Pukyong National University, Busan 48513, Republic of Korea.

9Ocean and Fisheries Development International Cooperation Institute, College of Fisheries Science, Pukyong National University, Busan 48513, Republic of Korea.

10International Graduate Program of Fisheries Science, Pukyong National University, Busan 48513, Republic of Korea.

*Corresponding author: kimhw@pknu.ac.kr (H.W.K) and [shantanu1984@pknu.ac.kr](mailto:shantanu1984@pknu.ac.kr), shantanu1984@gmail.com (S.K.)





**Supplementary** **Figure S1** The correlation between the covariates chosen for the final model for *M. tricarinata*. The Pearson correlation coefficient is primarily used here. However, if the Spearman or Kendall correlation coefficient exceeds the Pearson correlation coefficient, an “s” or “k” will be displayed in the bottom-right corner of the variable box.

**
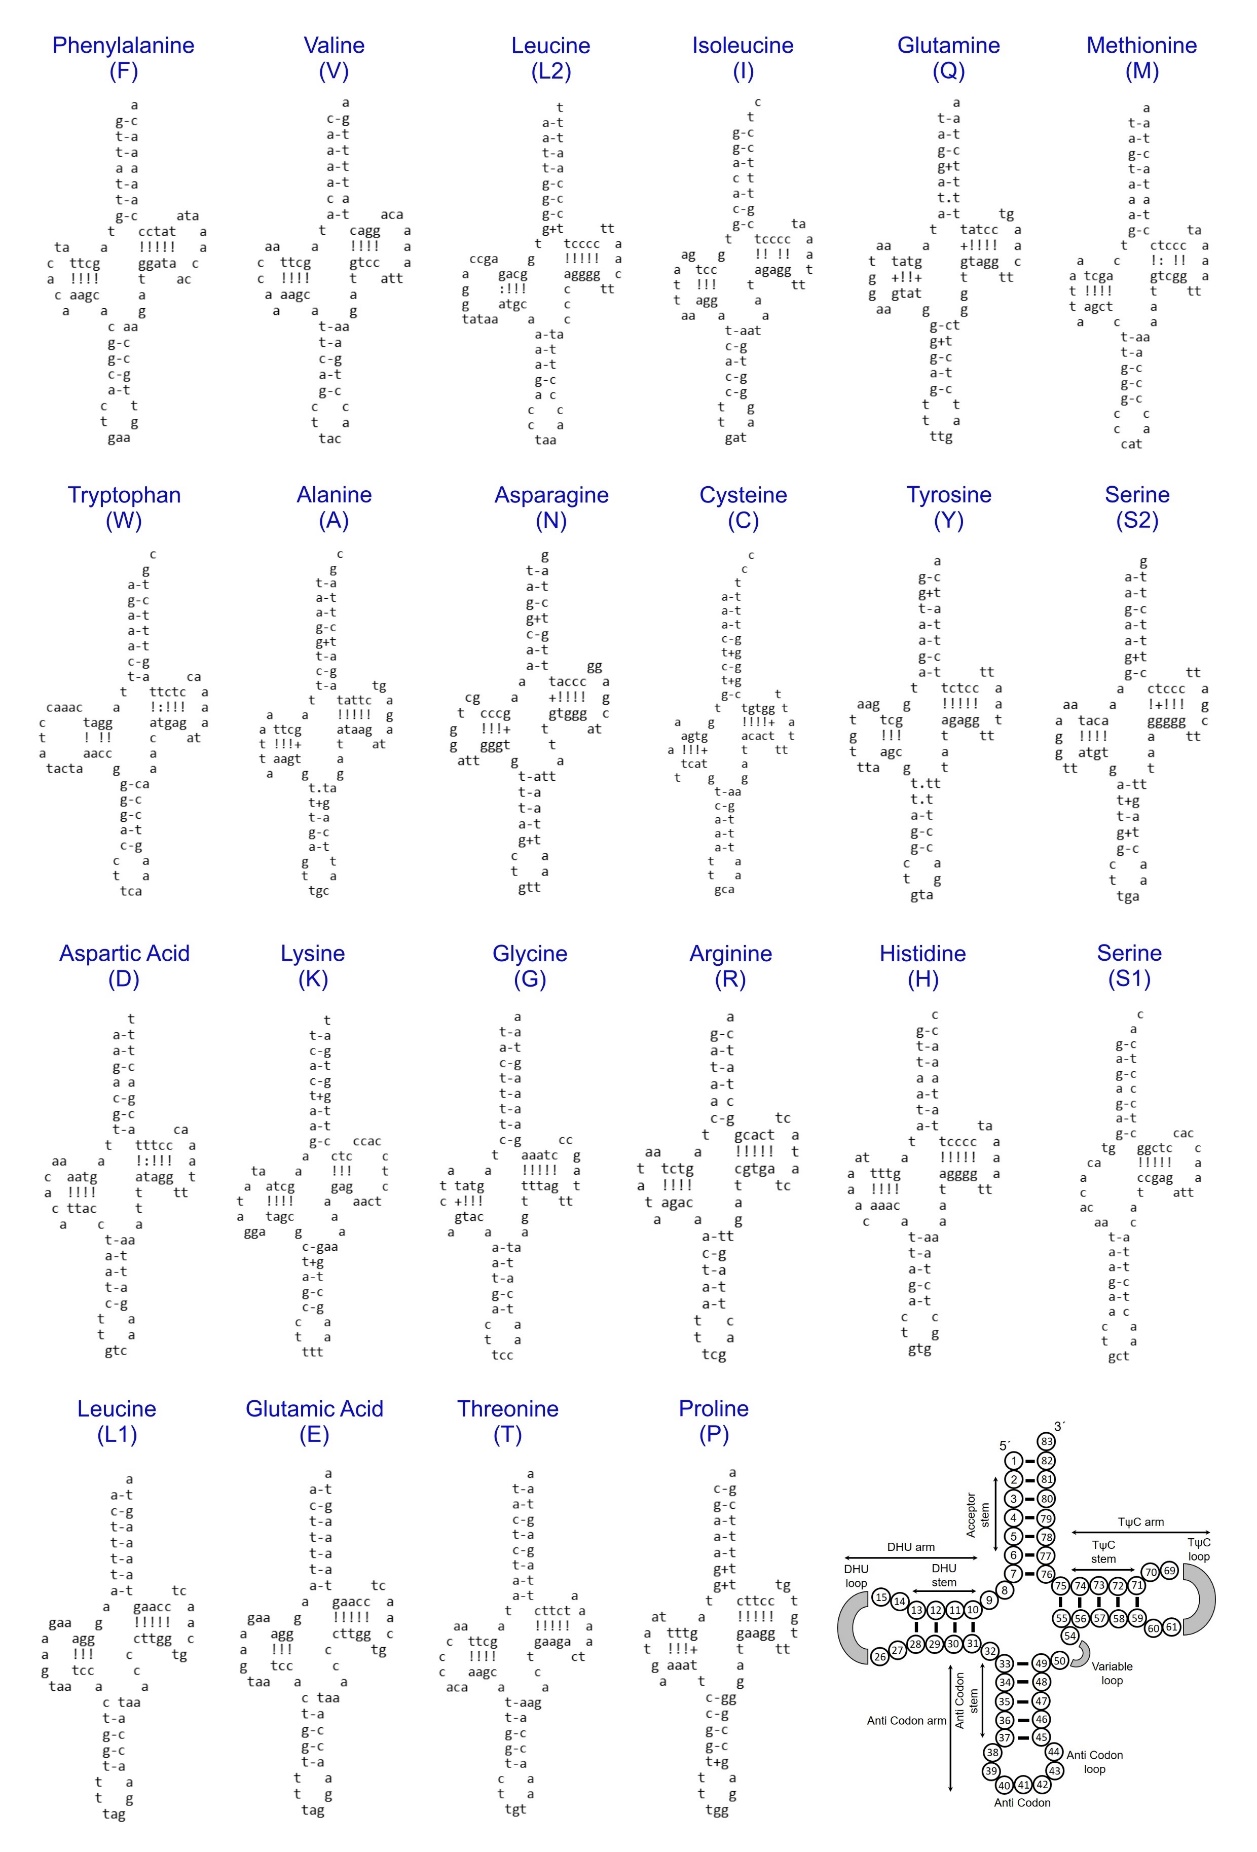
**

**Supplementary** **Figure S2.** The secondary structures of 22 transfer RNA genes (tRNAs) of *M. tricarinata* mitogenome display the structural variations. The last structure shows the nucleotide position and details of the tRNA stem-loop configuration. The wobble base pairs and anticodons are marked with red oval and blue rectangle, respectively.

**Supplementary**
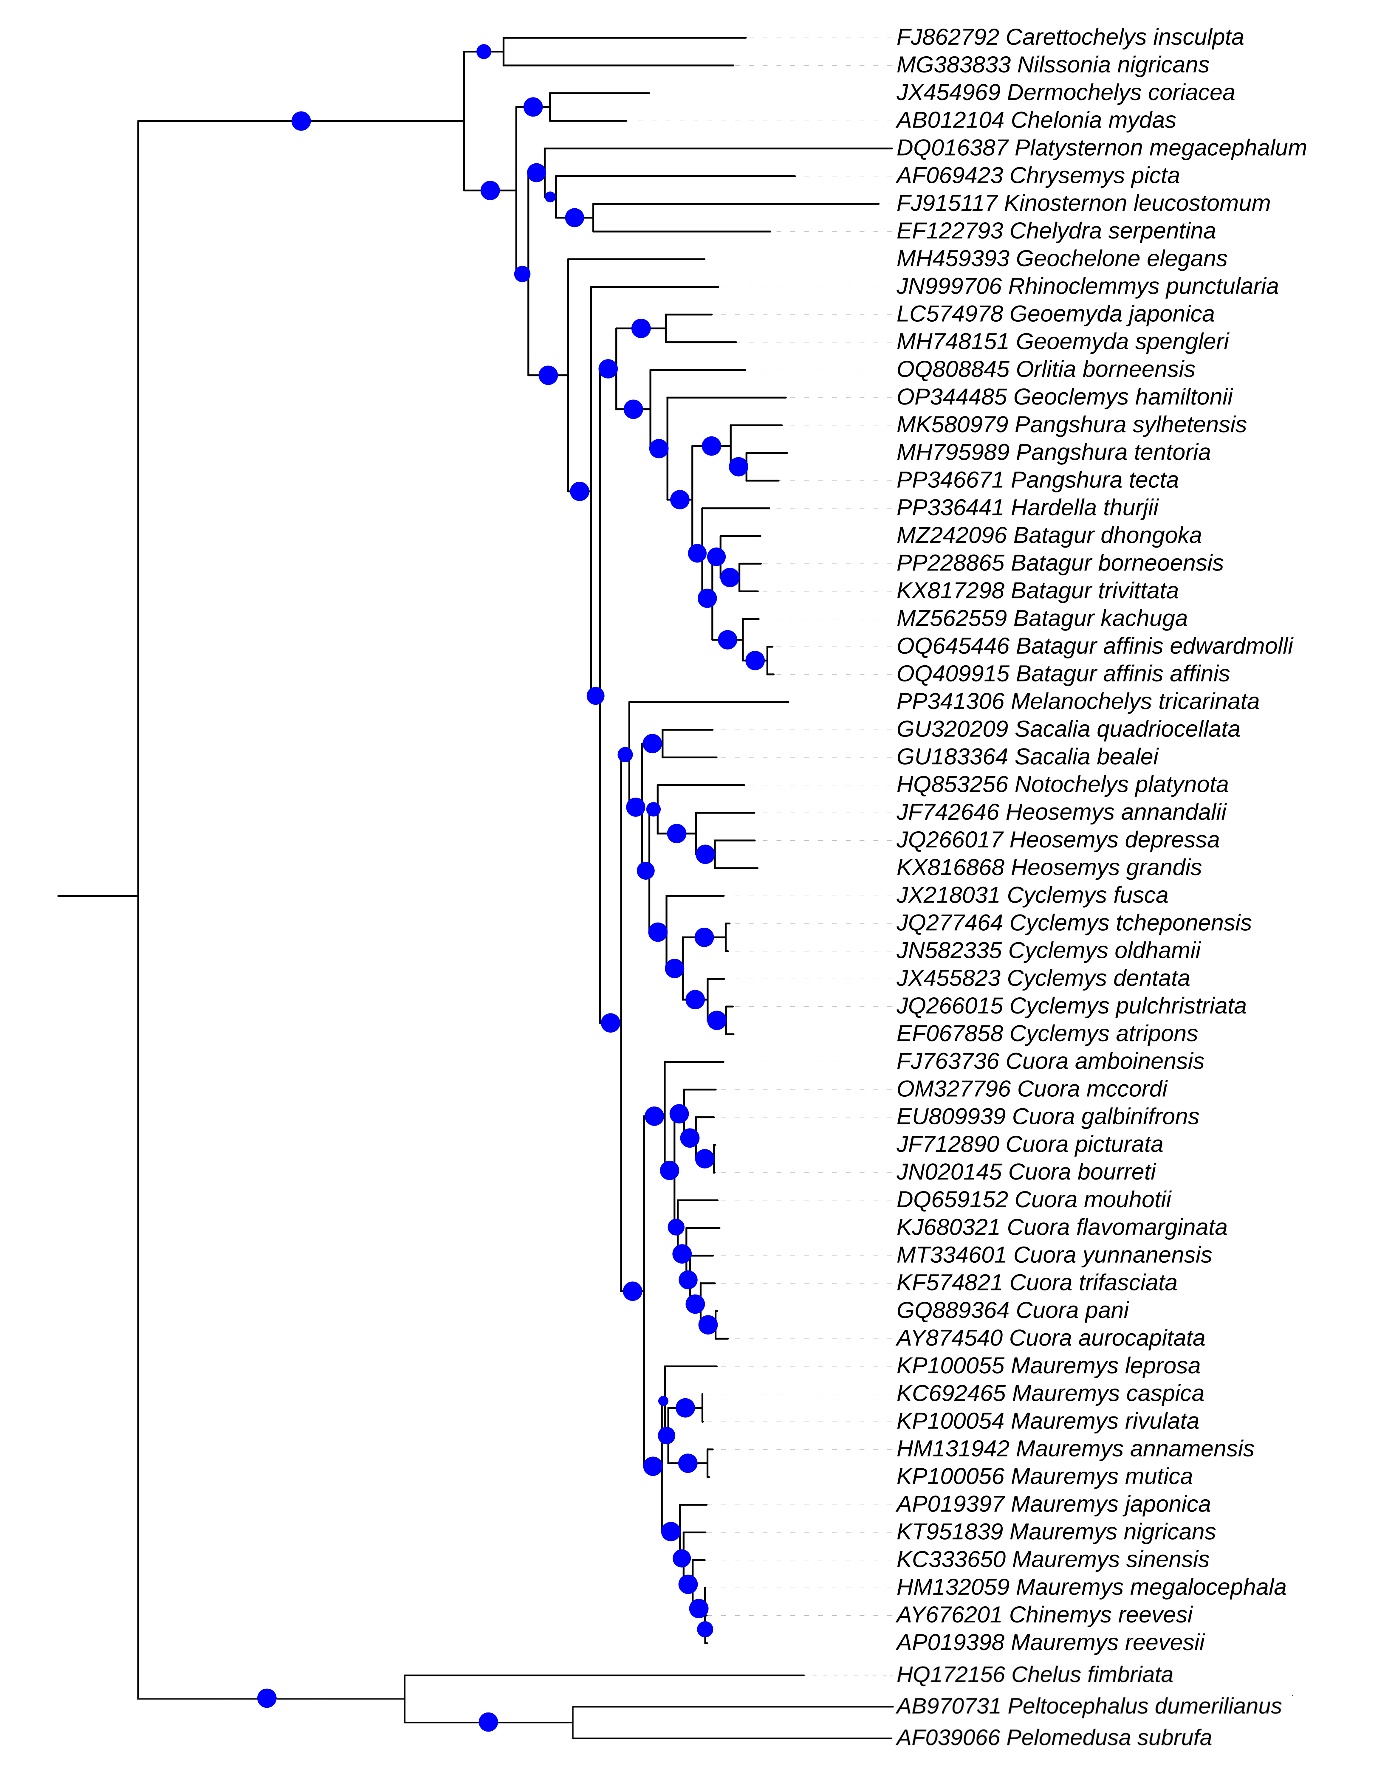
**Figure S3.** The Maximum-Likelihood (ML) phylogenetic tree illustrates the major evolutionary relationships *M. tricarinata* and other Testudines. Bootstrap supports values are represented by blue circular dots of varying sizes superimposed on each node.

**Supplementary** **Table S1.** Details of the mitogenome sequences generated and acquired from GenBank database for this study.

| **Sl. No.** | **Sub-Order** | **Family** | **Subfamily** | **Species Name** | **Accession No.** | **Size (bp)** |
| --- | --- | --- | --- | --- | --- | --- |
| 1 | Cryptodira | Geoemydidae | Geoemydinae | *Melanochelys tricarinata* | PP341306 | 16745 |
| 2 | Cryptodira | Geoemydidae | Geoemydinae | *Chinemys reevesi* | AY676201 | 16576 |
| 3 | Cryptodira | Geoemydidae | Geoemydinae | *Cuora amboinensis* | FJ763736 | 16708 |
| 4 | Cryptodira | Geoemydidae | Geoemydinae | *Cuora aurocapitata* | AY874540 | 16890 |
| 5 | Cryptodira | Geoemydidae | Geoemydinae | *Cuora bourreti* | JN020145 | 16649 |
| 6 | Cryptodira | Geoemydidae | Geoemydinae | *Cuora flavomarginata* | KJ680321 | 16721 |
| 7 | Cryptodira | Geoemydidae | Geoemydinae | *Cuora galbinifrons* | EU809939 | 17244 |
| 8 | Cryptodira | Geoemydidae | Geoemydinae | *Cuora mccordi* | OM327796 | 16551 |
| 9 | Cryptodira | Geoemydidae | Geoemydinae | *Cuora mouhotii* | DQ659152 | 16837 |
| 10 | Cryptodira | Geoemydidae | Geoemydinae | *Cuora pani* | GQ889364 | 16922 |
| 11 | Cryptodira | Geoemydidae | Geoemydinae | *Cuora picturata* | JF712890 | 16623 |
| 12 | Cryptodira | Geoemydidae | Geoemydinae | *Cuora trifasciata* | KF574821 | 16675 |
| 13 | Cryptodira | Geoemydidae | Geoemydinae | *Cuora yunnanensis* | MT334601 | 16023 |
| 14 | Cryptodira | Geoemydidae | Geoemydinae | *Cyclemys atripons* | EF067858 | 16500 |
| 15 | Cryptodira | Geoemydidae | Geoemydinae | *Cyclemys dentata* | JX455823 | 16489 |
| 16 | Cryptodira | Geoemydidae | Geoemydinae | *Cyclemys oldhamii* | JN582335 | 16656 |
| 17 | Cryptodira | Geoemydidae | Geoemydinae | *Cyclemys pulchristriata* | JQ266015 | 16527 |
| 18 | Cryptodira | Geoemydidae | Geoemydinae | *Cyclemys tcheponensis* | JQ277464 | 16593 |
| 19 | Cryptodira | Geoemydidae | Geoemydinae | *Cyclemys fusca* | JX218031 | 16491 |
| 20 | Cryptodira | Geoemydidae | Geoemydinae | *Geoemyda japonica* | LC574978 | 16820 |
| 21 | Cryptodira | Geoemydidae | Geoemydinae | *Geoemyda spengleri* | MH748151 | 17448 |
| 22 | Cryptodira | Geoemydidae | Geoemydinae | *Heosemys annandalii* | JF742646 | 16604 |
| 23 | Cryptodira | Geoemydidae | Geoemydinae | *Heosemys depressa* | JQ266017 | 16773 |
| 24 | Cryptodira | Geoemydidae | Geoemydinae | *Heosemys grandis* | KX816868 | 16581 |
| 25 | Cryptodira | Geoemydidae | Geoemydinae | *Mauremys annamensis* | HM131942 | 16844 |
| 26 | Cryptodira | Geoemydidae | Geoemydinae | *Mauremys caspica* | KC692465 | 16741 |
| 27 | Cryptodira | Geoemydidae | Geoemydinae | *Mauremys japonica* | AP019397 | 16443 |
| 28 | Cryptodira | Geoemydidae | Geoemydinae | *Mauremys leprosa* | KP100055 | 17067 |
| 29 | Cryptodira | Geoemydidae | Geoemydinae | *Mauremys megalocephala* | HM132059 | 16783 |
| 30 | Cryptodira | Geoemydidae | Geoemydinae | *Mauremys mutica* | KP100056 | 16775 |
| 31 | Cryptodira | Geoemydidae | Geoemydinae | *Mauremys nigricans* | KT951839 | 16779 |
| 32 | Cryptodira | Geoemydidae | Geoemydinae | *Mauremys reevesii* | AP019398 | 16784 |
| 33 | Cryptodira | Geoemydidae | Geoemydinae | *Mauremys rivulata* | KP100054 | 16766 |
| 34 | Cryptodira | Geoemydidae | Geoemydinae | *Mauremys sinensis* | KC333650 | 16458 |
| 35 | Cryptodira | Geoemydidae | Geoemydinae | *Notochelys platynota* | HQ853256 | 16981 |
| 36 | Cryptodira | Geoemydidae | Geoemydinae | *Sacalia bealei* | GU183364 | 16561 |
| 37 | Cryptodira | Geoemydidae | Geoemydinae | *Sacalia quadriocellata* | GU320209 | 16551 |
| 38 | Cryptodira | Geoemydidae | Batagurinae | *Hardella thurjii* | PP336441 | 16699 |
| 39 | Cryptodira | Geoemydidae | Batagurinae | *Batagur affinis affinis* | OQ409915 | 16625 |
| 40 | Cryptodira | Geoemydidae | Batagurinae | *Batagur affinis edwardmolli* | OQ645446 | 16630 |
| 41 | Cryptodira | Geoemydidae | Batagurinae | *Batagur borneoensis* | PP228865 | 16397 |
| 42 | Cryptodira | Geoemydidae | Batagurinae | *Batagur dhongoka* | MZ242096 | 15620 |
| 43 | Cryptodira | Geoemydidae | Batagurinae | *Batagur kachuga* | MZ562559 | 16517 |
| 44 | Cryptodira | Geoemydidae | Batagurinae | *Batagur trivittata* | KX817298 | 16463 |
| 45 | Cryptodira | Geoemydidae | Batagurinae | *Geoclemys hamiltonii* | OP344485 | 16509 |
| 46 | Cryptodira | Geoemydidae | Batagurinae | *Orlitia borneensis* | OQ808845 | 17588 |
| 47 | Cryptodira | Geoemydidae | Batagurinae | *Pangshura sylhetensis* | MK580979 | 16568 |
| 48 | Cryptodira | Geoemydidae | Batagurinae | *Pangshura tecta* | PP346671 | 16732 |
| 49 | Cryptodira | Geoemydidae | Batagurinae | *Pangshura tentoria* | MH795989 | 16657 |
| 50 | Cryptodira | Geoemydidae | Rhinoclemmydinae | *Rhinoclemmys punctularia* | JN999706 | 14154 |
| 51 | Cryptodira | Trionychidae | - | *Nilssonia nigricans* | MG383833 | 16796 |
| 52 | Cryptodira | Carettochelyidae | - | *Carettochelys insculpta* | FJ862792 | 16439 |
| 53 | Cryptodira | Kinosternidae | - | *Kinosternon leucostomum* | FJ915117 | 16559 |
| 54 | Cryptodira | Chelydridae | - | *Chelydra serpentina* | EF122793 | 16631 |
| 55 | Cryptodira | Dermochelyidae | - | *Dermochelys coriacea* | JX454969 | 16420 |
| 56 | Cryptodira | Cheloniidae | - | *Chelonia mydas* | AB012104 | 16497 |
| 57 | Cryptodira | Testudinidae | - | *Geochelone elegans* | MH459393 | 16446 |
| 58 | Cryptodira | Platysternidae | - | *Platysternon megacephalum* | DQ016387 | 19161 |
| 59 | Cryptodira | Emydidae | - | *Chrysemys picta* | AF069423 | 16866 |
| 60 | Pleurodira | Podocnemididae | - | *Peltocephalus dumerilianus* | AB970731 | 16601 |
| 61 | Pleurodira | Pelomedusidae | - | *Pelomedusa subrufa* | AF039066 | 16787 |
| 62 | Pleurodira | Chelidae | - | *Chelus fimbriata* | HQ172156 | 16661 |

**Supplementary** **Table S2.** Suitable habitat area (km²) for *M. tricarinata* across different extent under present and future climate scenarios.

| **Scenario** | **Training Extent** | **Within Forest Cover** | **IUCN Range** |
| --- | --- | --- | --- |
| Present | 374657 | 238039 | 176117 |
| SSP245 (2041-2060) | 306091 | 214332 | 121240 |
| SSP245 (2061-2080) | 295691 | 204398 | 113923 |
| SSP585 (2041-2060) | 256339 | 189705 | 110031 |
| SSP585 (2061-2080) | 235637 | 172783 | 106437 |
